# Supplementary material for: Effect of Fe2+substitution on the structure and electrochemistry of LiCoPO4prepared by mechanochemically assisted carbothermal reduction
Source: Royal Society of Chemistry journal article supplement (doi:10.1039/c4ta04221b), 2014-10-20
Supplement: c4ta04221b1.pdf [file c4ta04221b1.pdf]

### Supplementary Information

**Table S1.** Rietveld refined atomic positions in the  $\text{LiCo}_{1-y}\text{Fe}_y\text{PO}_4$  samples (S.G. *Pnma*).

| Atom                                                                                                                                                                              | Wyckoff position | <i>x</i>  | <i>y</i> | <i>z</i>  | Occ. |
|-----------------------------------------------------------------------------------------------------------------------------------------------------------------------------------|------------------|-----------|----------|-----------|------|
| $\text{LiCoPO}_4$ : $a=10.1742(3)$ Å, $b=5.9140(2)$ Å, $c=4.6915(2)$ Å, $V=282.29(3)$ Å <sup>3</sup><br>$R_{\text{wp}} = 3.36\%$ , $\chi^2 = 1.504$                               |                  |           |          |           |      |
| Li                                                                                                                                                                                | 4 <i>a</i>       | 0.5       | 0.5      | 1.0       | 1.0  |
| Co                                                                                                                                                                                | 4 <i>c</i>       | 0.7195(3) | 0.25     | 0.521(1)  | 1.0  |
| P                                                                                                                                                                                 | 4 <i>c</i>       | 0.5979(7) | 0.75     | 0.575(2)  | 1.0  |
| O (1)                                                                                                                                                                             | 4 <i>c</i>       | 0.458(2)  | 0.75     | 0.724(2)  | 1.0  |
| O (2)                                                                                                                                                                             | 4 <i>c</i>       | 0.595(1)  | 0.75     | 0.258(3)  | 1.0  |
| O (3)                                                                                                                                                                             | 8 <i>d</i>       | 0.660(1)  | 0.543(1) | 0.728(2)  | 1.0  |
| $\text{LiCo}_{0.95}\text{Fe}_{0.05}\text{PO}_4$ : $a=10.1788(3)$ Å, $b=5.9126(2)$ Å, $c=4.6910(2)$ Å, $V=282.32(2)$ Å <sup>3</sup><br>$R_{\text{wp}} = 3.56\%$ , $\chi^2 = 1.626$ |                  |           |          |           |      |
| Li                                                                                                                                                                                | 4 <i>c</i>       | 0.5       | 0.5      | 1.0       | 1.0  |
| Co                                                                                                                                                                                | 4 <i>c</i>       | 0.7216(2) | 0.25     | 0.5193(8) | 0.95 |
| Fe                                                                                                                                                                                | 4 <i>c</i>       | 0.7216(2) | 0.25     | 0.5193(8) | 0.05 |
| P                                                                                                                                                                                 | 4 <i>c</i>       | 0.5958(6) | 0.75     | 0.578(1)  | 1.0  |
| O (1)                                                                                                                                                                             | 4 <i>c</i>       | 0.452(1)  | 0.75     | 0.721(2)  | 1.0  |
| O (2)                                                                                                                                                                             | 4 <i>c</i>       | 0.591(1)  | 0.75     | 0.255(2)  | 1.0  |
| O (3)                                                                                                                                                                             | 8 <i>d</i>       | 0.6633(9) | 0.541(1) | 0.721(1)  | 1.0  |
| $\text{LiCo}_{0.9}\text{Fe}_{0.1}\text{PO}_4$ : $a=10.1901(3)$ Å, $b=5.9207(2)$ Å, $c=4.6905(2)$ Å, $V=282.99(2)$ Å <sup>3</sup><br>$R_{\text{wp}} = 3.88\%$ , $\chi^2 = 1.896$   |                  |           |          |           |      |
| Li                                                                                                                                                                                | 4 <i>c</i>       | 0.5       | 0.5      | 1.0       | 1.0  |
| Co                                                                                                                                                                                | 4 <i>c</i>       | 0.7212(3) | 0.25     | 0.5202(8) | 0.9  |
| Fe                                                                                                                                                                                | 4 <i>c</i>       | 0.7212(3) | 0.25     | 0.5202(8) | 0.1  |
| P                                                                                                                                                                                 | 4 <i>c</i>       | 0.5952(6) | 0.75     | 0.579(1)  | 1.0  |
| O (1)                                                                                                                                                                             | 4 <i>c</i>       | 0.452(1)  | 0.75     | 0.721(2)  | 1.0  |
| O (2)                                                                                                                                                                             | 4 <i>c</i>       | 0.595(1)  | 0.75     | 0.258(2)  | 1.0  |
| O (3)                                                                                                                                                                             | 8 <i>d</i>       | 0.6621(9) | 0.540(1) | 0.723(1)  | 1.0  |
| $\text{LiCo}_{0.75}\text{Fe}_{0.25}\text{PO}_4$ : $a=10.2071(3)$ Å, $b=5.9328(2)$ Å, $c=4.6899(2)$ Å, $V=283.97(2)$ Å <sup>3</sup><br>$R_{\text{wp}} = 4.44\%$ , $\chi^2 = 2.165$ |                  |           |          |           |      |
| Li                                                                                                                                                                                | 4 <i>c</i>       | 0.5       | 0.5      | 1.0       | 1.0  |
| Co                                                                                                                                                                                | 4 <i>c</i>       | 0.7204(2) | 0.25     | 0.5225(8) | 0.75 |
| Fe                                                                                                                                                                                | 4 <i>c</i>       | 0.7204(2) | 0.25     | 0.5225(8) | 0.25 |
| P                                                                                                                                                                                 | 4 <i>c</i>       | 0.5949(6) | 0.75     | 0.581(1)  | 1.0  |
| O (1)                                                                                                                                                                             | 4 <i>c</i>       | 0.452(1)  | 0.75     | 0.722(2)  | 1.0  |
| O (2)                                                                                                                                                                             | 4 <i>c</i>       | 0.593(1)  | 0.75     | 0.256(2)  | 1.0  |

|                                                                                                                                            |    |           |          |           |      |
|--------------------------------------------------------------------------------------------------------------------------------------------|----|-----------|----------|-----------|------|
| O (3)                                                                                                                                      | 8d | 0.6628(9) | 0.542(1) | 0.720(1)  | 1.0  |
| LiCo <sub>0.5</sub> Fe <sub>0.5</sub> PO <sub>4</sub> : $a=10.2381(2)$ Å, $b=5.9556(1)$ Å, $c=4.6878(1)$ Å, $V=285.83(2)$ Å <sup>3</sup>   |    |           |          |           |      |
| R <sub>wp</sub> = 5.81 %, $\chi^2 = 1.559$                                                                                                 |    |           |          |           |      |
| Li                                                                                                                                         | 4c | 0.5       | 0.5      | 1.0       | 1.0  |
| Co                                                                                                                                         | 4c | 0.7204(2) | 0.25     | 0.5233(7) | 0.5  |
| Fe                                                                                                                                         | 4c | 0.7204(2) | 0.25     | 0.5233(7) | 0.5  |
| P                                                                                                                                          | 4c | 0.5948(4) | 0.75     | 0.579(1)  | 1.0  |
| O (1)                                                                                                                                      | 4c | 0.451(1)  | 0.75     | 0.721(2)  | 1.0  |
| O (2)                                                                                                                                      | 4c | 0.5919(9) | 0.75     | 0.253(2)  | 1.0  |
| O (3)                                                                                                                                      | 8d | 0.6633(7) | 0.544(1) | 0.719(1)  | 1.0  |
| LiCo <sub>0.25</sub> Fe <sub>0.75</sub> PO <sub>4</sub> : $a=10.2721(2)$ Å, $b=5.9750(1)$ Å, $c=4.6853(1)$ Å, $V=287.56(2)$ Å <sup>3</sup> |    |           |          |           |      |
| R <sub>wp</sub> = 7.33 %, $\chi^2 = 1.843$                                                                                                 |    |           |          |           |      |
| Li                                                                                                                                         | 4c | 0.5       | 0.5      | 1.0       | 1.0  |
| Co                                                                                                                                         | 4c | 0.7189(2) | 0.25     | 0.5236(6) | 0.25 |
| Fe                                                                                                                                         | 4c | 0.7189(2) | 0.25     | 0.5236(6) | 0.75 |
| P                                                                                                                                          | 4c | 0.5945(4) | 0.75     | 0.580(1)  | 1.0  |
| O (1)                                                                                                                                      | 4c | 0.452(1)  | 0.75     | 0.719(1)  | 1.0  |
| O (2)                                                                                                                                      | 4c | 0.5939(9) | 0.75     | 0.251(2)  | 1.0  |
| O (3)                                                                                                                                      | 8d | 0.6629(7) | 0.544(1) | 0.718(1)  | 1.0  |
| LiCo <sub>0.10</sub> Fe <sub>0.90</sub> PO <sub>4</sub> : $a=10.2915(2)$ Å, $b=5.9865(1)$ Å, $c=4.6836(1)$ Å, $V=288.55(2)$ Å <sup>3</sup> |    |           |          |           |      |
| R <sub>wp</sub> = 8.46 %, $\chi^2 = 1.983$                                                                                                 |    |           |          |           |      |
| Li                                                                                                                                         | 4c | 0.5       | 0.5      | 1.0       | 1.0  |
| Co                                                                                                                                         | 4c | 0.7182(2) | 0.25     | 0.5240(5) | 0.10 |
| Fe                                                                                                                                         | 4c | 0.7182(2) | 0.25     | 0.5240(5) | 0.90 |
| P                                                                                                                                          | 4c | 0.5952(4) | 0.75     | 0.5781(9) | 1.0  |
| O (1)                                                                                                                                      | 4c | 0.451(1)  | 0.75     | 0.722(1)  | 1.0  |
| O (2)                                                                                                                                      | 4c | 0.5917(9) | 0.75     | 0.251(2)  | 1.0  |
| O (3)                                                                                                                                      | 8d | 0.6619(6) | 0.545(1) | 0.719(1)  | 1.0  |
| LiCo <sub>0.05</sub> Fe <sub>0.95</sub> PO <sub>4</sub> : $a=10.3058(5)$ Å, $b=5.9943(3)$ Å, $c=4.6823(3)$ Å, $V=289.44(4)$ Å <sup>3</sup> |    |           |          |           |      |
| R <sub>wp</sub> = 12.52 %, $\chi^2 = 3.873$                                                                                                |    |           |          |           |      |
| Li                                                                                                                                         | 4c | 0.5       | 0.5      | 1.0       | 1.0  |
| Co                                                                                                                                         | 4c | 0.7189(3) | 0.25     | 0.5233(9) | 0.05 |
| Fe                                                                                                                                         | 4c | 0.7189(3) | 0.25     | 0.5233(9) | 0.95 |
| P                                                                                                                                          | 4c | 0.5950(7) | 0.75     | 0.583(2)  | 1.0  |
| O (1)                                                                                                                                      | 4c | 0.453(2)  | 0.75     | 0.735(2)  | 1.0  |
| O (2)                                                                                                                                      | 4c | 0.591(2)  | 0.75     | 0.267(3)  | 1.0  |
| O (3)                                                                                                                                      | 8d | 0.661(1)  | 0.544(2) | 0.721(2)  | 1.0  |

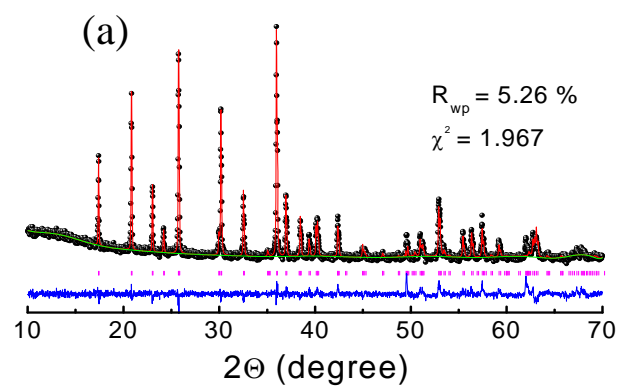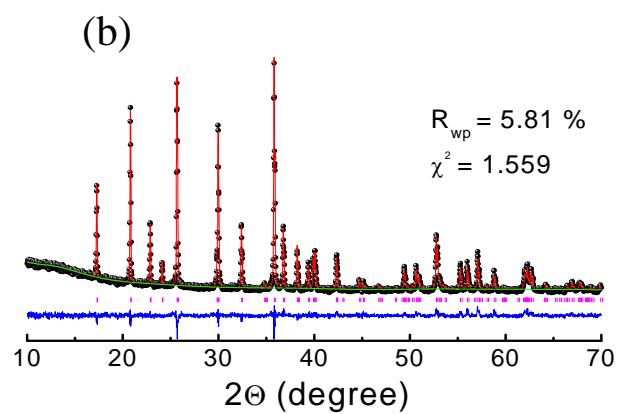

**Figure S1.** Rietveld refined XRD patterns of  $\text{LiCoPO}_4$  (a) and  $\text{LiCo}_{0.5}\text{Fe}_{0.5}\text{PO}_4$  (b) based on the orthorhombic structure with  $Pnma$  space group.

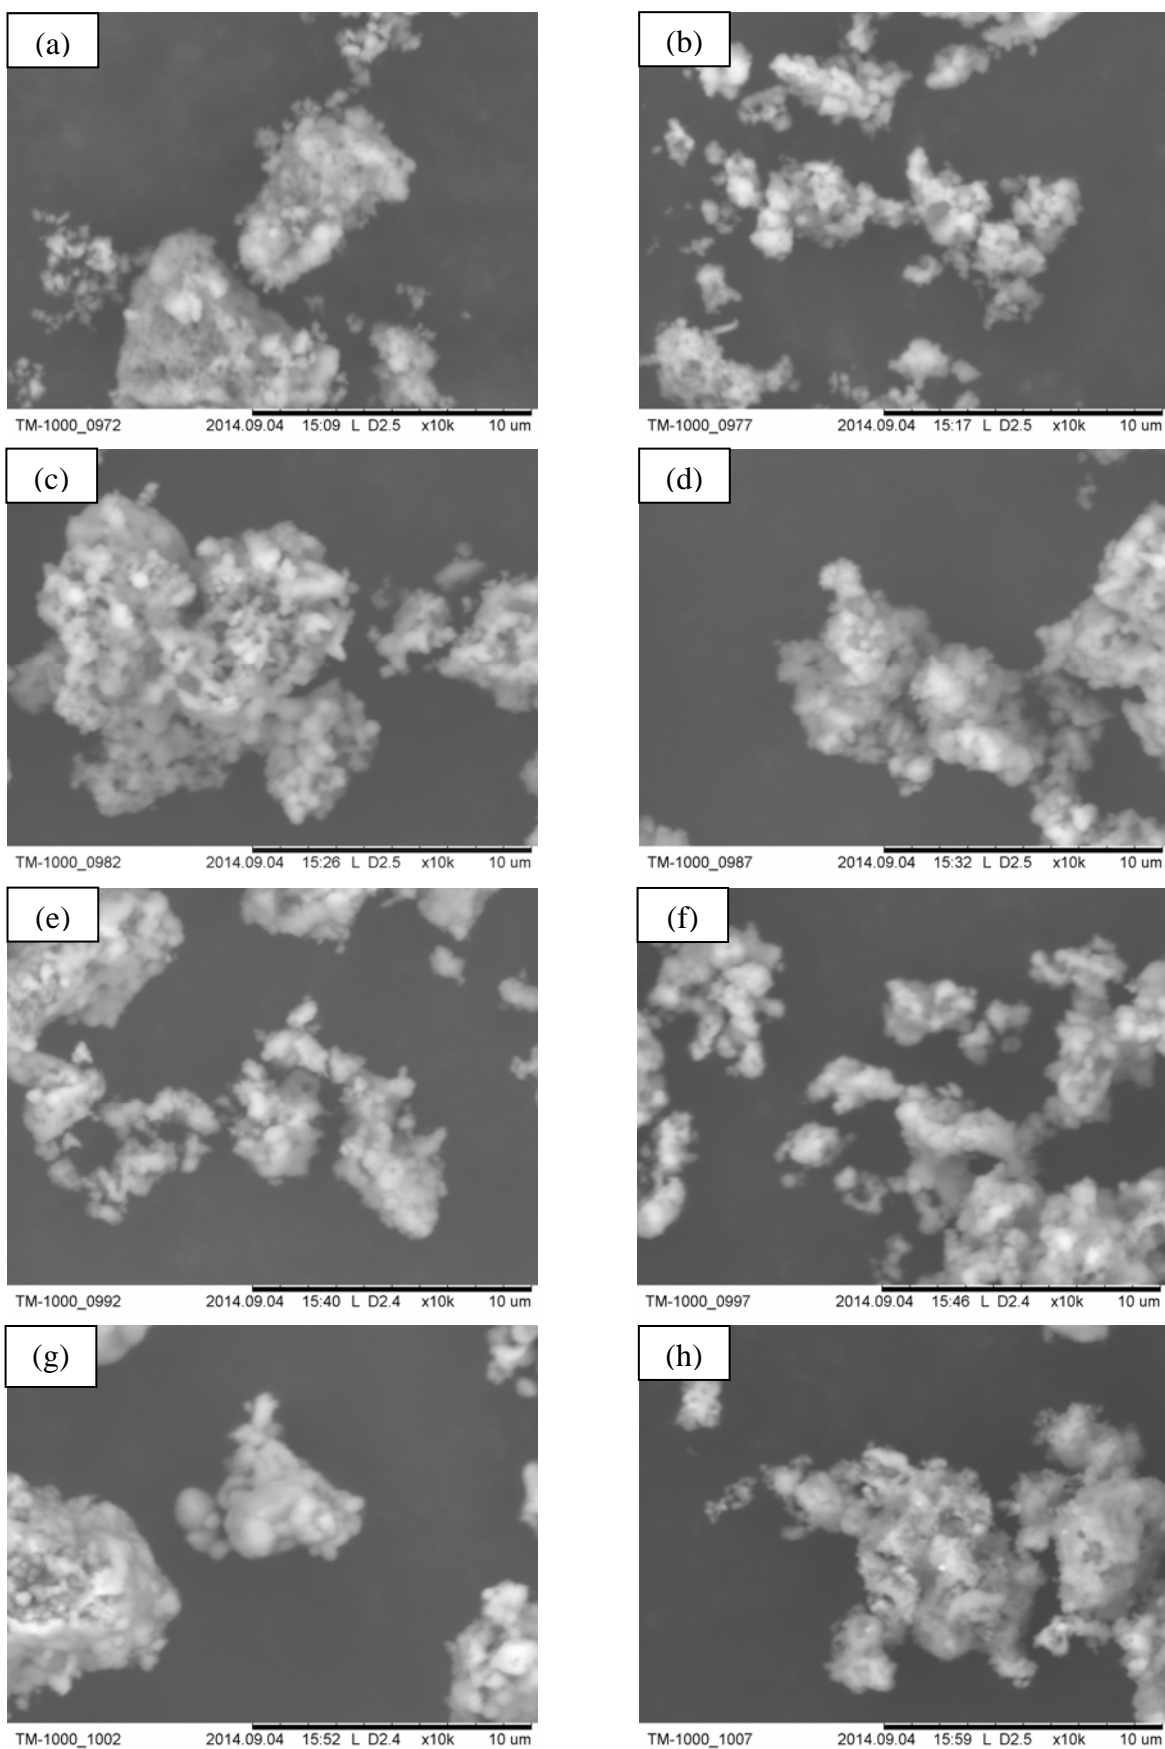

**Figure S2.** SEM images of  $\text{LiCo}_{1-y}\text{Fe}_y\text{PO}_4$  samples:  $y = 0$  (a); 0.05 (b); 0.10 (c); 0.25 (d); 0.50 (e); 0.75 (f); 0.90 (g); 0.95 (h).

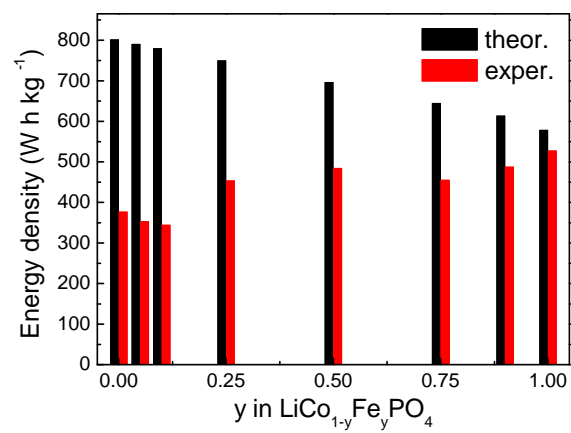

**Figure S3.** Comparison of theoretical and practical energy densities of the  $\text{LiCo}_{1-y}\text{Fe}_y\text{PO}_4$  samples.
